# Supplementary material
Source: PubMed Central journal article supplement (PMC8242377)
Supplement: JGS-69-2079-s001.pdf [file JGS-69-2079-s001.pdf]

**Supplemental Table S1: Adjusted Resident COVID-19 Log-Linear Estimates of the Zero Inflated Negative Binomial Model<sup>1</sup>**

|                           |                                | Parameter Estimate | Std. Error | 95% Lower Limit | 95% Upper Limit | P-value |
|---------------------------|--------------------------------|--------------------|------------|-----------------|-----------------|---------|
| <b>Negative Binomial</b>  |                                |                    |            |                 |                 |         |
| <b>Time</b>               | <b>Week</b>                    | -0.07              | 0.02       | -0.10           | -0.03           | <.0001  |
| <b>Vaccinations</b>       | <b>Three Weeks Post Clinic</b> | -0.13              | 0.07       | -0.26           | 0.01            | 0.06    |
|                           | <b>Four Weeks Post Clinic</b>  | -0.17              | 0.09       | -0.34           | 0.00            | 0.05    |
|                           | <b>Five Weeks Post Clinic</b>  | -0.39              | 0.11       | -0.61           | -0.17           | 0.00    |
|                           | <b>Six Weeks Post Clinic</b>   | -0.45              | 0.15       | -0.74           | -0.15           | 0.00    |
| <b>County</b>             | <b>Weekly Covid Rate</b>       | 0.01               | 0.00       | 0.01            | 0.01            | <.0001  |
| <b>Bed Size</b>           | <b>&lt;=50 Beds</b>            | -0.41              | 0.20       | -0.81           | -0.01           | 0.04    |
|                           | <b>50-120 Beds</b>             | Ref.               | .          | .               | .               | .       |
|                           | <b>&gt;120Beds</b>             | -0.14              | 0.10       | -0.35           | 0.06            | 0.18    |
| <b>Urban</b>              | <b>Yes</b>                     | -0.04              | 0.16       | -0.35           | 0.27            | 0.82    |
|                           | <b>No</b>                      | Ref.               | .          | .               | .               | .       |
| <b>Racial Minority</b>    | <b>Low</b>                     | Ref.               | .          | .               | .               | .       |
|                           | <b>Medium</b>                  | 0.20               | 0.16       | -0.11           | 0.51            | 0.21    |
|                           | <b>Medium-High</b>             | 0.15               | 0.17       | -0.18           | 0.47            | 0.37    |
|                           | <b>High</b>                    | -0.22              | 0.18       | -0.58           | 0.13            | 0.21    |
| <b>Hispanic Non-White</b> | <b>Low</b>                     | Ref.               | .          | .               | .               | .       |
|                           | <b>Medium</b>                  | -0.06              | 0.15       | -0.36           | 0.24            | 0.69    |
|                           | <b>Medium-High</b>             | -0.25              | 0.14       | -0.52           | 0.03            | 0.08    |
|                           | <b>High</b>                    | -0.87              | 0.15       | -1.18           | -0.57           | <.0001  |
| <b>RN Staffing</b>        | <b>&lt;=0.449</b>              | -0.08              | 0.11       | -0.30           | 0.14            | 0.47    |
|                           | <b>0.449-0.987</b>             | Ref.               | .          | .               | .               | .       |
|                           | <b>&gt; 0.987</b>              | -0.18              | 0.13       | -0.43           | 0.07            | 0.16    |
| <b>Zero Model</b>         |                                |                    |            |                 |                 |         |
| <b>Time</b>               | <b>Week</b>                    | -0.07              | 0.03       | -0.13           | -0.01           | 0.03    |
| <b>County</b>             | <b>Weekly Covid Rate</b>       | -0.05              | 0.01       | -0.06           | -0.04           | <.0001  |
| <b>Bed Size</b>           | <b>&lt;=50 Beds</b>            | 0.22               | 0.26       | -0.29           | 0.73            | 0.39    |
|                           | <b>50-120 Beds</b>             | Ref.               | .          | .               | .               | .       |
|                           | <b>&gt;120 Beds</b>            | -0.84              | 0.15       | -1.12           | -0.55           | <.0001  |
| <b>Urban</b>              | <b>Yes</b>                     | -0.60              | 0.17       | -0.93           | -0.27           | 0.00    |
|                           | <b>No</b>                      | Ref.               | .          | .               | .               | .       |
| <b>Racial Minority</b>    | <b>Low</b>                     | Ref.               | .          | .               | .               | .       |
|                           | <b>Medium</b>                  | -0.23              | 0.18       | -0.57           | 0.12            | 0.20    |
|                           | <b>Medium-High</b>             | 0.12               | 0.19       | -0.25           | 0.50            | 0.53    |
|                           | <b>High</b>                    | 0.32               | 0.21       | -0.09           | 0.74            | 0.13    |
| <b>Hispanic Non-White</b> | <b>Low</b>                     | Ref.               | .          | .               | .               | .       |
|                           | <b>Medium</b>                  | -0.13              | 0.17       | -0.47           | 0.21            | 0.46    |
|                           | <b>Medium-High</b>             | -0.07              | 0.16       | -0.38           | 0.25            | 0.68    |
|                           | <b>High</b>                    | -0.64              | 0.23       | -1.09           | -0.20           | 0.00    |

<sup>1</sup> Log-linear estimates modeling the adjusted effect of the independent indicators on the resident COVID-19 case counts per resident-weeks with a random intercept for each cluster-facility in the negative binomial state

**Supplemental Table S2: Adjusted Resident COVID-19 Mortality Log-Linear Estimates of the Zero Inflated Negative Binomial Model<sup>2</sup>**

|                           |                                | Parameter Estimate | Std. Error | 95% Lower Limit | 95% Upper Limit | P-value |
|---------------------------|--------------------------------|--------------------|------------|-----------------|-----------------|---------|
| <b>Negative Binomial</b>  |                                |                    |            |                 |                 |         |
| <b>Time</b>               | <b>Week</b>                    | 0.00               | 0.03       | -0.05           | 0.05            | 0.92    |
| <b>Vaccinations</b>       | <b>Three Weeks Post Clinic</b> | -0.10              | 0.09       | -0.27           | 0.07            | 0.25    |
|                           | <b>Four Weeks Post Clinic</b>  | -0.25              | 0.11       | -0.46           | -0.04           | 0.02    |
|                           | <b>Five Weeks Post Clinic</b>  | -0.53              | 0.14       | -0.80           | -0.26           | 0.00    |
|                           | <b>Six Weeks Post Clinic</b>   | -0.80              | 0.19       | -1.17           | -0.43           | <.0001  |
| <b>County</b>             | <b>Weekly Covid Rate</b>       | 0.00               | 0.00       | 0.00            | 0.00            | 0.84    |
| <b>Bed Size</b>           | <b>&lt;=50 Beds</b>            | -0.62              | 0.28       | -1.18           | -0.07           | 0.03    |
|                           | <b>50-120 Beds</b>             |                    |            |                 |                 |         |
|                           | <b>&gt;120Beds</b>             | 0.04               | 0.13       | -0.22           | 0.30            | 0.76    |
| <b>Urban</b>              | <b>Yes</b>                     | -0.19              | 0.20       | -0.58           | 0.20            | 0.34    |
|                           | <b>No</b>                      | Ref.               | .          | .               | .               | .       |
| <b>Racial Minority</b>    | <b>Low</b>                     | Ref.               | .          | .               | .               | .       |
|                           | <b>Medium</b>                  | 0.13               | 0.20       | -0.26           | 0.52            | 0.51    |
|                           | <b>Medium-High</b>             | -0.09              | 0.21       | -0.50           | 0.32            | 0.66    |
|                           | <b>High</b>                    | -0.91              | 0.23       | -1.36           | -0.46           | <.0001  |
| <b>Hispanic Non-White</b> | <b>Low</b>                     |                    |            |                 |                 |         |
|                           | <b>Medium</b>                  | -0.25              | 0.19       | -0.63           | 0.13            | 0.20    |
|                           | <b>Medium-High</b>             | -0.61              | 0.18       | -0.96           | -0.26           | 0.00    |
|                           | <b>High</b>                    | -1.69              | 0.20       | -2.09           | -1.29           | <.0001  |
| <b>RN Staffing</b>        | <b>&lt;=0.449</b>              | 0.05               | 0.14       | -0.23           | 0.32            | 0.73    |
|                           | <b>0.449-0.987</b>             | Ref.               | .          | .               | .               | .       |
|                           | <b>&gt; 0.987</b>              | -0.38              | 0.16       | -0.70           | -0.07           | 0.02    |
| <b>Zero Model</b>         |                                |                    |            |                 |                 |         |
| <b>Time</b>               | <b>Week</b>                    | -0.15              | 0.04       | -0.24           | -0.07           | 0.00    |
| <b>County</b>             | <b>Weekly Covid Rate</b>       | -0.04              | 0.01       | -0.05           | -0.03           | <.0001  |
| <b>Bed Size</b>           | <b>&lt;=50 Beds</b>            | 0.12               | 0.35       | -0.57           | 0.82            | 0.73    |
|                           | <b>50-120 Beds</b>             | Ref.               | .          | .               | .               | .       |
|                           | <b>&gt;120 Beds</b>            | -0.13              | 0.16       | -0.44           | 0.17            | 0.39    |
| <b>Urban</b>              | <b>Yes</b>                     | -0.38              | 0.19       | -0.75           | -0.01           | 0.05    |
|                           | <b>No</b>                      | Ref.               | .          | .               | .               | .       |
| <b>Racial Minority</b>    | <b>Low</b>                     | Ref.               | .          | .               | .               | .       |
|                           | <b>Medium</b>                  | -0.11              | 0.20       | -0.51           | 0.28            | 0.58    |
|                           | <b>Medium-High</b>             | 0.02               | 0.24       | -0.44           | 0.48            | 0.93    |
|                           | <b>High</b>                    | 0.00               | 0.27       | -0.53           | 0.53            | 1.00    |
| <b>Hispanic Non-White</b> | <b>Low</b>                     | Ref.               | .          | .               | .               | .       |
|                           | <b>Medium</b>                  | -0.39              | 0.20       | -0.78           | 0.00            | 0.05    |
|                           | <b>Medium-High</b>             | -0.41              | 0.19       | -0.79           | -0.03           | 0.03    |
|                           | <b>High</b>                    | -0.84              | 0.30       | -1.43           | -0.24           | 0.01    |

<sup>2</sup> Log-linear estimates modeling the adjusted effect of the independent indicators on the resident COVID-19 mortality counts per resident-weeks with a random intercept for each cluster-facility in the negative binomial state.

**Supplemental Table S3: Adjusted Staff COVID-19 Log-Linear Estimates of the Zero Inflated Negative Binomial Model<sup>3</sup>**

|                           |                                | Parameter Estimate | Std. Error | 95% Lower Limit | 95% Upper Limit | P-value |
|---------------------------|--------------------------------|--------------------|------------|-----------------|-----------------|---------|
| <b>Negative Binomial</b>  |                                |                    |            |                 |                 |         |
| <b>Time</b>               | <b>Week</b>                    | 0.04               | 0.01       | 0.02            | 0.06            | 0.00    |
| <b>Vaccinations</b>       | <b>Three Weeks Post Clinic</b> | -0.16              | 0.04       | -0.25           | -0.08           | 0.00    |
|                           | <b>Four Weeks Post Clinic</b>  | -0.28              | 0.06       | -0.39           | -0.17           | <.0001  |
|                           | <b>Five Weeks Post Clinic</b>  | -0.45              | 0.07       | -0.59           | -0.31           | <.0001  |
|                           | <b>Six Weeks Post Clinic</b>   | -0.67              | 0.10       | -0.87           | -0.48           | <.0001  |
| <b>County</b>             | <b>Weekly Covid Rate</b>       | 0.01               | 0.00       | 0.01            | 0.01            | <.0001  |
| <b>Bed Size</b>           | <b>&lt;=50 Beds</b>            | 0.18               | 0.11       | -0.04           | 0.40            | 0.10    |
|                           | <b>50-120 Beds</b>             | Ref.               | .          | .               | .               | .       |
|                           | <b>&gt;120Beds</b>             | -0.18              | 0.06       | -0.30           | -0.06           | 0.00    |
| <b>Urban</b>              | <b>Yes</b>                     | -0.04              | 0.09       | -0.22           | 0.14            | 0.65    |
|                           | <b>No</b>                      | Ref.               | .          | .               | .               | .       |
| <b>Racial Minority</b>    | <b>Low</b>                     | Ref.               | .          | .               | .               | .       |
|                           | <b>Medium</b>                  | 0.19               | 0.09       | 0.01            | 0.36            | 0.04    |
|                           | <b>Medium-High</b>             | 0.08               | 0.10       | -0.11           | 0.26            | 0.43    |
|                           | <b>High</b>                    | -0.11              | 0.10       | -0.31           | 0.09            | 0.28    |
| <b>Hispanic Non-White</b> | <b>Low</b>                     | Ref.               | .          | .               | .               | .       |
|                           | <b>Medium</b>                  | -0.05              | 0.09       | -0.23           | 0.13            | 0.57    |
|                           | <b>Medium-High</b>             | -0.39              | 0.08       | -0.54           | -0.23           | <.0001  |
|                           | <b>High</b>                    | -0.74              | 0.09       | -0.91           | -0.56           | <.0001  |
| <b>RN Staffing</b>        | <b>&lt;=0.449</b>              | -0.02              | 0.07       | -0.15           | 0.12            | 0.81    |
|                           | <b>0.449-0.987</b>             | Ref.               | .          | .               | .               | .       |
|                           | <b>&gt; 0.987</b>              | -0.18              | 0.07       | -0.32           | -0.04           | 0.01    |
| <b>Zero Model</b>         |                                |                    |            |                 |                 |         |
| <b>Time</b>               | <b>Week</b>                    | 0.08               | 0.04       | 0.00            | 0.16            | 0.06    |
| <b>County</b>             | <b>Weekly Covid Rate</b>       | -0.08              | 0.01       | -0.11           | -0.06           | <.0001  |
| <b>Bed Size</b>           | <b>&lt;=50 Beds</b>            | -0.01              | 0.33       | -0.65           | 0.64            | 0.98    |
|                           | <b>50-120 Beds</b>             | Ref.               | .          | .               | .               | .       |
|                           | <b>&gt;120 Beds</b>            | -1.65              | 0.31       | -2.26           | -1.05           | <.0001  |
| <b>Urban</b>              | <b>Yes</b>                     | -0.60              | 0.23       | -1.05           | -0.15           | 0.01    |
|                           | <b>No</b>                      | Ref.               | .          | .               | .               | .       |
| <b>Racial Minority</b>    | <b>Low</b>                     | Ref.               | .          | .               | .               | .       |
|                           | <b>Medium</b>                  | -0.25              | 0.24       | -0.71           | 0.22            | 0.30    |
|                           | <b>Medium-High</b>             | 0.16               | 0.27       | -0.37           | 0.69            | 0.56    |
|                           | <b>High</b>                    | 0.17               | 0.31       | -0.44           | 0.79            | 0.58    |
| <b>Hispanic Non-White</b> | <b>Low</b>                     | Ref.               | .          | .               | .               | .       |
|                           | <b>Medium</b>                  | 0.62               | 0.23       | 0.16            | 1.08            | 0.01    |
|                           | <b>Medium-High</b>             | -0.39              | 0.26       | -0.89           | 0.11            | 0.13    |
|                           | <b>High</b>                    | -1.03              | 0.47       | -1.95           | -0.11           | 0.03    |

<sup>3</sup> Log-linear estimates modeling the adjusted effect of the independent indicators on the staff COVID-19 case counts per FTE staff-weeks with a random intercept for each cluster-facility in the negative binomial state.
